# Supplementary material
Source: Springer Nature journal article supplement (https://www.springermedizin.de/resource/supplementary/12902_2014_249_MOESM2_ESM.pdf/9515872)

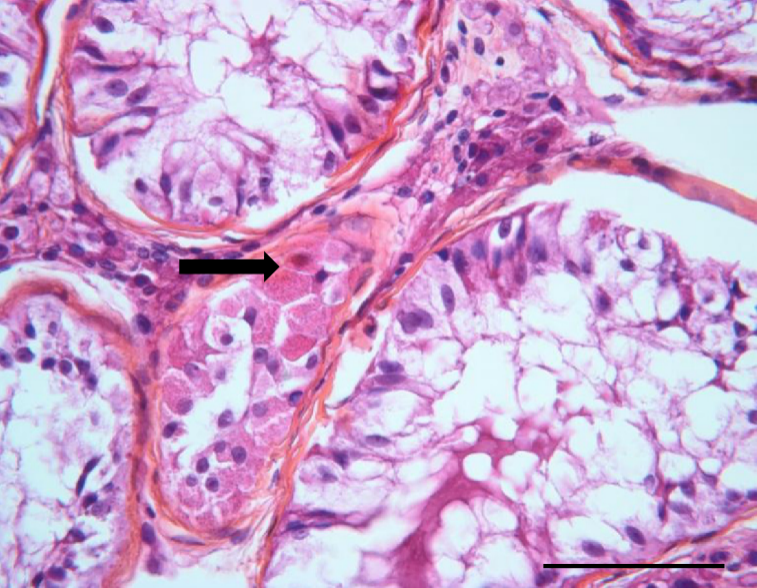

Supplement: MOESM2 [file 9515872]
